# Supplementary material
Source: MDPI journal article supplement (https://www.mdpi.com/1424-2818/15/4/549)
Supplement: s1 [file s1 › diversity-2243598-supplementary.pdf]

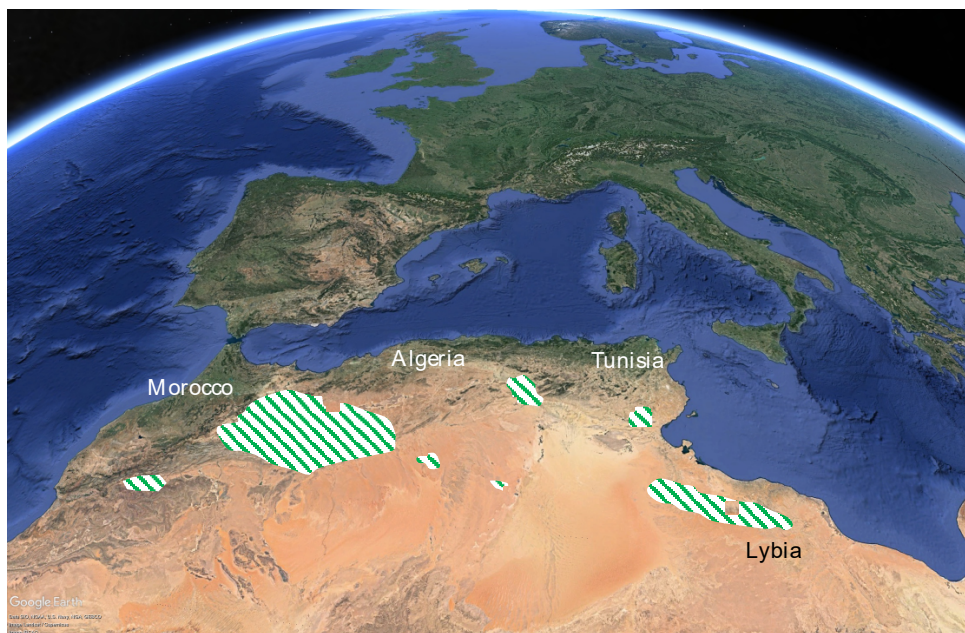

**Figure S1.** Current estimated distribution of Dupont's lark in the Maghreb (shaded areas) derived from Birdlife International data zone (<http://datazone.birdlife.org/species/requestdis>). Distribution within Tunisia was estimated taking into account data presented in this paper (mentioned as Suarez et al. *in lit*).

**Table S1.** Number of broadcasting trials in different habitat types of Tunisia (most common species in the patch). Dupont's larks were detected exclusively in alfa grass. In Morocco, 85,2% of detections occurred in pure or mixed patches of alfa grass, 9,5% in *Noaea spp.* and 5,3% in *Artemisia spp.* [7]

| Most common species            | Total      |
|--------------------------------|------------|
| <i>Lygeum sparteum</i>         | 2          |
| <i>Artemisia spp.</i>          | 8          |
| <i>Astragalus armatus</i>      | 4          |
| Alfa grass                     | 68         |
| <i>Gymnospermum spp.</i>       | 7          |
| <i>Hammada scoparia</i>        | 24         |
| <i>Salsola spp./Sueda spp.</i> | 10         |
| <b>Total</b>                   | <b>123</b> |
